# Supplementary material
Source: MDPI journal article supplement (https://www.mdpi.com/2073-4352/9/5/256)
Supplement: s1 [file s1]

# Supporting Materials for Crystal Structure Optimization and Gibbs Free Energy Comparison of Five Sulfathiazole Polymorphs by the Embedded Fragment QM Method at the DFT Level

Xuan Hao <sup>1,2,†</sup>, Jinfeng Liu <sup>3,†</sup>, Hongyuan Luo <sup>2</sup>, Yanqiang Han <sup>2</sup>, Wenxin Hu <sup>4</sup>, Jinyun Liu <sup>5,\*</sup>,  
Jinjin Li <sup>2,\*</sup> and Xiao He <sup>1,6,\*</sup>

<sup>1</sup> Shanghai Engineering Research Center of Molecular Therapeutics and New Drug Development, School of Chemistry and Molecular Engineering, East China Normal University, Shanghai 200062, China; haoxuan\_0716@163.com

<sup>2</sup> National Key Laboratory of Science and Technology on Micro/Nano Fabrication, Key Laboratory for Thin Film and Microfabrication of Ministry of Education, Department of Micro/Nano-Electronics, Shanghai Jiao Tong University, Shanghai 200240, China; joker\_luo@sjtu.edu.cn (H.L.); hanyanqiang@sjtu.edu.cn (Y.H.)

<sup>3</sup> State Key Laboratory of Natural Medicines, Department of Basic Medicine and Clinical Pharmacy, China Pharmaceutical University, Nanjing 210009, China; liujinfeng.1119@163.com

<sup>4</sup> The Computer Center, School of Computer Science and Software Engineering, East China Normal University, Shanghai 200062, China; wxhu@cc.ecnu.edu.cn

<sup>5</sup> Key Laboratory of Functional Molecular Solids, Ministry of Education, College of Chemistry and Materials Science, Anhui Normal University, Wuhu, Anhui 241002, China

<sup>6</sup> NYU-ECNU Center for Computational Chemistry at NYU Shanghai, Shanghai 200062, China

\* Correspondence: jyliu@ahnu.edu.cn (J.Liu.); lijijin@sjtu.edu.cn (J.Li.); xiaohe@phy.ecnu.edu.cn (X.H.)

† These two authors contributed equally to this work.

Received: 27 April 2019; Accepted: 13 May 2019; Published: date

The vibrational spectrum acts as a fingerprint to identify the crystal structure of the molecule. Here, we calculate the Raman and IR spectra to investigate the different forms of sulfathiazole (STZ) molecules. Figures S1-S2 show the calculated Raman and IR spectra of five forms of STZ from 0 to 4000  $\text{cm}^{-1}$ , respectively. The five forms exhibit remarkable Raman and IR peaks in the range of 1-2000  $\text{cm}^{-1}$  and 3000-4000  $\text{cm}^{-1}$ , but the positions of the corresponding peaks are quite different for different forms. Such differences can be used to identify the five forms of sulfathiazole crystals. Based on the experimental work proposed by Munroe *et al.*, where they measured the Raman spectra of five STZ polymorphs in laboratory from 1100 to 1500  $\text{cm}^{-1}$ , we pick the corresponding calculated Raman spectra and compare them with the experiment (as shown in Figure 4). Figure 4 not only provides an efficient method to distinguish the five STZ forms from the view of Raman spectra, but also verify the correctness of our proposed theoretical work since it matches the experimental results. However, the IR spectra for the five STZ polymorphs have not been measured in laboratory, hence we did not

pick the corresponding calculated IR bands to compare with the experiment. We hope the calculated results shown in Figure S2 can assist the IR spectral measurement in laboratory in the future. Table S1 shows the calculated Gibbs free energy differences of five polymorphs of STZ with reference to FIII. As shown in Table S1, the calculated stability order for five polymorphs of STZ is FI<FV<FIV<FII<FIII, which agrees well with the experimental results (see Figure 3).

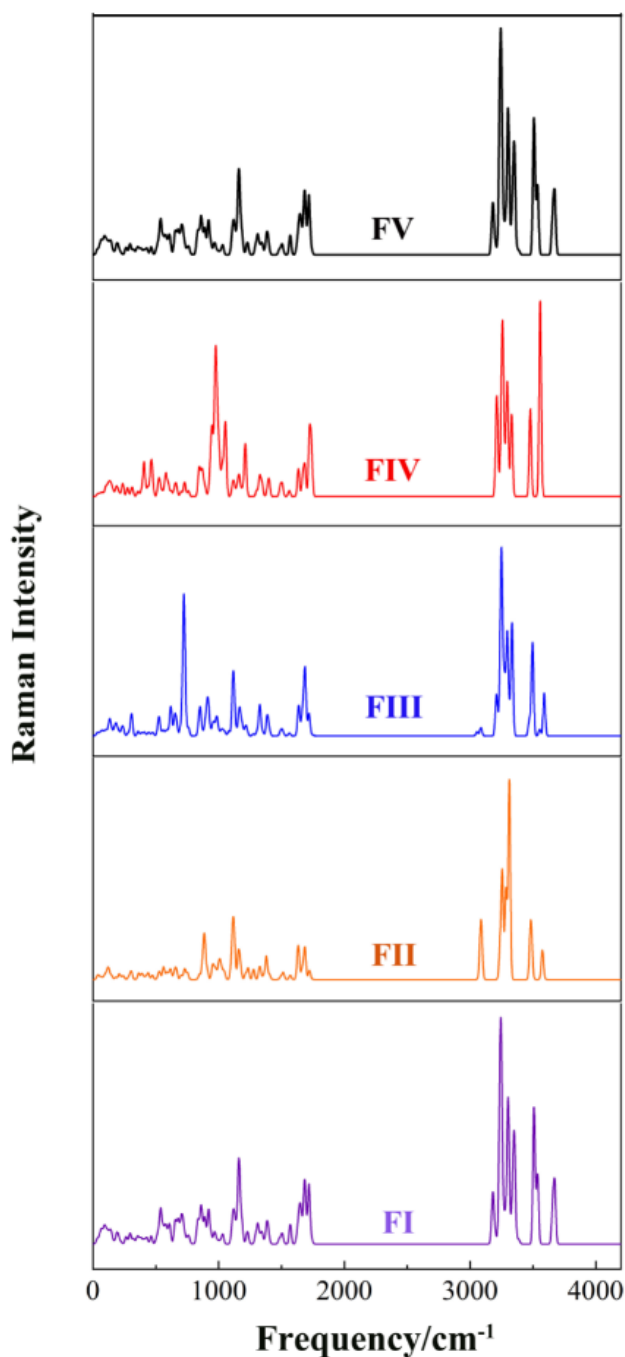

**Figure S1** Calculated Raman spectra of five forms of STZ under standard atmospheric pressure.

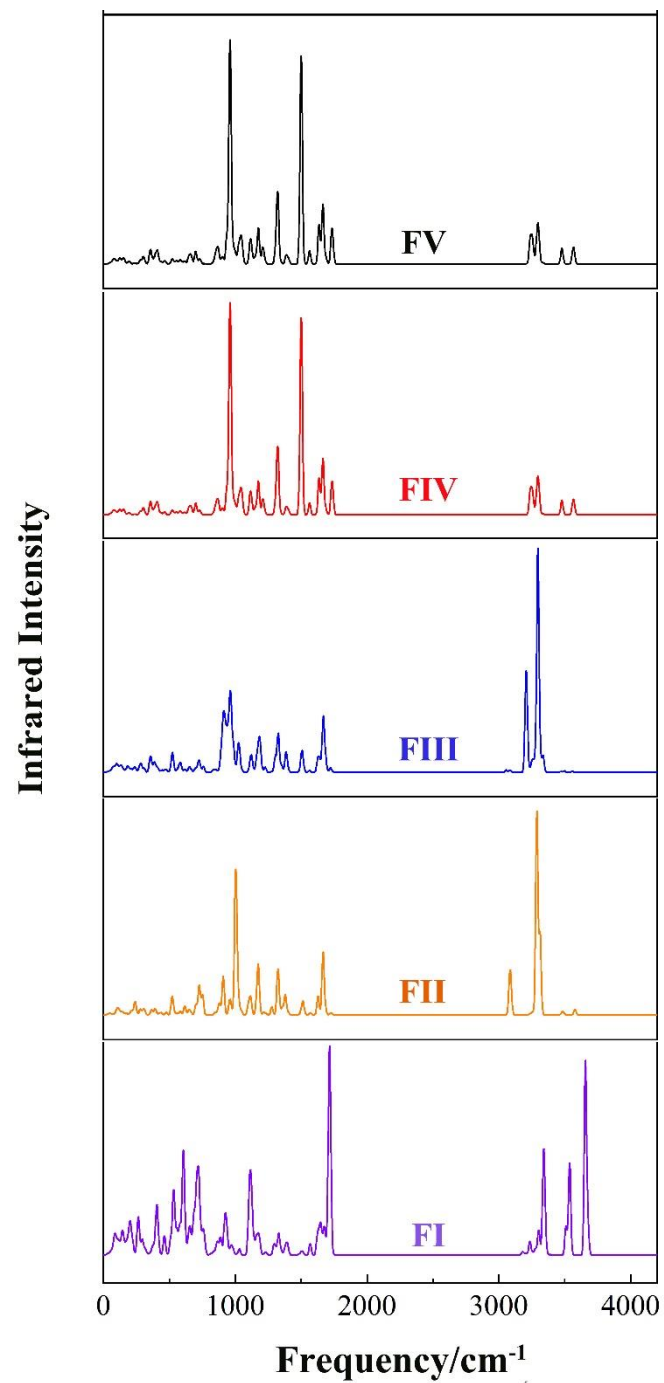

**Figure S2** Calculated IR spectra of five forms of STZ under standard atmospheric pressure.

**Table S1** The Gibbs free energy differences of five polymorphs of STZ. The calculated energy differences per molecule of STZ is for FI, FV, FIV, FII, with reference to FIII, respectively.

| Polymorph | Gibbs free energy difference (kcal/mol) |
|-----------|-----------------------------------------|
| FI        | 2.174                                   |
| FII       | 0.255                                   |
| FIII      | 0                                       |
| FIV       | 0.292                                   |
| FV        | 2.171                                   |
